# Supplementary material
Source: PubMed Central journal article supplement (PMC5559038)
Supplement: pnas.1706011114.sapp.pdf [file pnas.1706011114.sapp.pdf]

## SI Appendix

### **Rho-associated kinase is a therapeutic target in neuroblastoma**

Cecilia Dyberg<sup>a</sup>, Susanne Fransson<sup>b</sup>, Teodora Andonova<sup>a</sup>, Baldur Sveinbjörnsson<sup>a,c</sup>, Jessika Lännerholm-Palm<sup>a</sup>, Thale K. Olsen<sup>a</sup>, David Forsberg<sup>d</sup>, Eric Herlenius<sup>d</sup>, Tommy Martinsson<sup>b</sup>, Bertha Brodin<sup>e</sup>, Per Kogner<sup>a</sup>, John Inge Johnsen<sup>a,†</sup> and Malin Wickström<sup>a,\*</sup>, †

<sup>a</sup>Childhood Cancer Research Unit, Department of Women's and Children's Health, Karolinska Institutet, 171 76 Stockholm, Sweden.

<sup>b</sup>Department of Pathology and Genetics, Sahlgrenska Academy at the University of Gothenburg, 405 30 Gothenburg, Sweden.

<sup>c</sup>Department of Medical Biology, University of Tromsø, 9037 Tromsø, Norway.

<sup>d</sup>Pediatric Unit, Department of Women's and Children's Health, Karolinska Institutet, 171 76 Stockholm, Sweden.

<sup>e</sup>Department of Oncology and Pathology, Karolinska Institutet, 171 76 Stockholm, Sweden.

\*Correspondence should be addressed to M.W. ([malin.wickstrom@ki.se](mailto:malin.wickstrom@ki.se)) or JI.J. ([john.inge.johnsen@ki.se](mailto:john.inge.johnsen@ki.se)).

†M.W. and JI.J. contributed equally and share the last authorship.

**Table S1:** Rare variants in neuroblastoma patients (n=15). Rare protein changing variants not present in dpSNP, 1000 genome, ESP or in house controls. Somatic status not confirmed.

|      | Gene     | Sample    | Chr   | Position  | Reference | Observed | Cytoband | Zygoty       | SNP | Exonic Function         | Amino acid change                                                                                                                                                                                                                                       |
|------|----------|-----------|-------|-----------|-----------|----------|----------|--------------|-----|-------------------------|---------------------------------------------------------------------------------------------------------------------------------------------------------------------------------------------------------------------------------------------------------|
| GEFs | AKAP13   | NBL46R2   | chr15 | 86163336  | A         | G        | 15q25.3  | heterozygous | -   | nonsynonymous SNV       | AKAP13:uc010bnf.1:exon1:c.A14G:p.H5R                                                                                                                                                                                                                    |
|      | ALS2     | NBL3E2    | chr2  | 202569898 | C         | G        | 2q33.1   | heterozygous | -   | nonsynonymous SNV       | ALS2:uc002uyo.3:exon31:c.G4652C:p.C1551S                                                                                                                                                                                                                |
|      | ALS2     | NBL4E1    | chr2  | 202598080 | CAGTATTC  | -        | 2q33.1   | heterozygous | -   | nonframeshift deletion  | ALS2:uc002uyo.3:exon13:c.2491_2499del:p.831_833del,ALS2:uc002uyp.4:exon13:c.2491_2499del:p.831_833del                                                                                                                                                   |
|      | ALS2     | NBL3E2    | chr2  | 202617935 | A         | T        | 2q33.1   | heterozygous | -   | nonsynonymous SNV       | ALS2:uc002uyo.3:exon7:c.T1671A:p.D557E,ALS2:uc002uyp.4:exon7:c.T1671A:p.D557E,ALS2:uc002uyq.3:exon7:c.T1671A:p.D557E                                                                                                                                    |
|      | ARHGEF11 | NBL52R2   | chr1  | 156918243 | C         | T        | 1q23.1   | heterozygous | -   | nonsynonymous SNV       | ARHGEF11:uc010phu.2:exon2:c.G101A:p.R34Q,ARHGEF11:uc001fqp.1:exon4:c.G410A:p.R137Q,ARHGEF11:uc001fgo.3:exon22:c.G1853A:p.R618Q,ARHGEF11:uc001fqm.3:exon23:c.G1973A:p.R658Q                                                                              |
|      | ARHGEF16 | NBL14R2   | chr1  | 3379907   | C         | G        | 1p36.32  | heterozygous | -   | nonsynonymous SNV       | ARHGEF16:uc001akg.4:exon2:c.C259G:p.Q87E                                                                                                                                                                                                                |
|      | ARHGEF17 | NBL14R2   | chr11 | 73076579  | G         | A        | 11q13.4  | heterozygous | -   | nonsynonymous SNV       | ARHGEF17:uc001otu.3:exon19:c.G5695A:p.V1899I                                                                                                                                                                                                            |
|      | ARHGEF2  | NBL50R1   | chr1  | 155934917 | C         | A        | 1q22     | heterozygous | -   | nonsynonymous SNV       | ARHGEF2:uc001fmr.2:exon7:c.G502T:p.V168L,ARHGEF2:uc001fms.2:exon7:c.G583T:p.V195L,ARHGEF2:uc001fmt.2:exon7:c.G586T:p.V196L,ARHGEF2:uc010pgt.1:exon7:c.G505T:p.V169L,ARHGEF2:uc010pgu.1:exon10:c.G721T:p.V241L,ARHGEF2:uc001fmu.2:exon11:c.G718T:p.V240L |
|      | ARHGEF25 | NBL28R8   | chr12 | 58010176  | -         | CTTGGAGA | 12q13.3  | heterozygous | -   | nonframeshift insertion | ARHGEF25:uc001spb.3:exon14:c.1530_1531insCTT:p.Q510delinsQL,ARHGEF25:uc001spa.3:exon15:c.1212_1213insCTT:p.Q404delinsQL,ARHGEF25:uc009zpy.3:exon15:c.1647_1648insCTT:p.Q549delinsQL                                                                     |
|      | ARHGEF33 | NBL50R1   | chr2  | 39156066  | G         | A        | 2p22.1   | heterozygous | -   | nonsynonymous SNV       | ARHGEF33:uc021vgd.1:exon3:c.G94A:p.E32K                                                                                                                                                                                                                 |
|      | ARHGEF38 | NBL17E2   | chr4  | 106588301 | C         | T        | 4q24     | heterozygous | -   | stopgain SNV            | ARHGEF38:uc003hvx.2:exon12:c.C1705T:p.Q569X                                                                                                                                                                                                             |
|      | ARHGEF40 | NBL48R&cT | chr14 | 21548849  | G         | A        | 14q11.2  | heterozygous | -   | nonsynonymous SNV       | ARHGEF40:uc001vzp.3:exon12:c.G2404A:p.E82K,ARHGEF40:uc010thn.2:exon12:c.G262A:p.E88K                                                                                                                                                                    |
|      | ARHGEF40 | NBL19R6   | chr14 | 21552099  | C         | T        | 14q11.2  | heterozygous | -   | nonsynonymous SNV       | ARHGEF40:uc001vzo.1:exon12:c.C916T:p.P306S,ARHGEF40:uc001vzp.3:exon17:c.C3679T:p.P1227S,ARHGEF40:uc010thn.2:exon17:c.C1537T:p.P513S                                                                                                                     |
|      | ECT2L    | NBL19R6   | chr6  | 139165651 | G         | A        | 6q24.1   | heterozygous | -   | nonsynonymous SNV       | ECT2L:uc011edq.1:exon4:c.G491A:p.R164Q,ECT2L:uc021zfx.1:exon6:c.G698A:p.R233Q,ECT2L:uc003qif.2:exon7:c.G698A:p.R233Q                                                                                                                                    |
|      | FGD2     | NBL47R4   | chr6  | 36979531  | C         | G        | 6p21.2   | heterozygous | -   | nonsynonymous SNV       | FGD2:uc010jwp.1:exon4:c.C428G:p.P143R                                                                                                                                                                                                                   |

|         |         |       |           |   |   |         |              |   |                   |                                                                                                                                                                                                                                                                                                |
|---------|---------|-------|-----------|---|---|---------|--------------|---|-------------------|------------------------------------------------------------------------------------------------------------------------------------------------------------------------------------------------------------------------------------------------------------------------------------------------|
| FGD2    | NBL13E5 | chr6  | 36981404  | G | A | 6p21.2  | heterozygous | - | nonsynonymous SNV | FGD2:uc010jwp.1:exon5:c.G547A:p.G183S                                                                                                                                                                                                                                                          |
| ITSN2   | NBL3E2  | chr2  | 24522948  | C | T | 2p23.3  | heterozygous | - | nonsynonymous SNV | ITSN2:uc002rfe.2:exon12:c.G1174A:p.E392K,ITSN2:uc002rft.2:exon12:c.G1174A:p.E392K,ITSN2:uc002rfg.3:exon12:c.G1174A:p.E392K,ITSN2:uc010eyd.2:exon13:c.G1249A:p.E417K                                                                                                                            |
| MCF2    | NBL47R4 | chrX  | 138729056 | C | T | Xq27.1  | heterozygous | - | nonsynonymous SNV | MCF2:uc004faw.2:exon3:c.G32A:p.R11Q,MCF2:uc011mwn.1:exon3:c.G287A:p.R96Q,MCF2:uc011mwo.1:exon3:c.G32A:p.R11Q                                                                                                                                                                                   |
| MCF2L   | NBL47R4 | chr13 | 113730406 | A | C | 13q34   | heterozygous | - | nonsynonymous SNV | MCF2L:uc001vst.1:exon10:c.A1321C:p.N441H,MCF2L:uc001vsq.3:exon12:c.A1606C:p.N536H,MCF2L:uc001vsr.3:exon12:c.A1447C:p.N483H,MCF2L:uc001vss.4:exon12:c.A1429C:p.N477H,MCF2L:uc001vsu.3:exon12:c.A1606C:p.N536H,MCF2L:uc010tjr.2:exon12:c.A1435C:p.N479H,MCF2L:uc010tjs.2:exon12:c.A1429C:p.N477H |
| OBSCN   | NBL59R9 | chr1  | 228403327 | C | T | 1q42.13 | heterozygous | - | nonsynonymous SNV | OBSCN:uc001hsn.3:exon6:c.C1892T:p.T631I,OBSCN:uc009xez.1:exon6:c.C1892T:p.T631I                                                                                                                                                                                                                |
| OBSCN   | NBL19R6 | chr1  | 228444409 | C | T | 1q42.13 | heterozygous | - | nonsynonymous SNV | OBSCN:uc001hsn.3:exon15:c.C4367T:p.A1456V,OBSCN:uc009xez.1:exon15:c.C4367T:p.A1456V                                                                                                                                                                                                            |
| OBSCN   | NBL50R1 | chr1  | 228475602 | G | C | 1q42.13 | heterozygous | - | nonsynonymous SNV | OBSCN:uc001hsq.1:exon7:c.G1520C:p.S507T,OBSCN:uc001hsn.3:exon36:c.G9752C:p.S3251T,OBSCN:uc009xez.1:exon36:c.G9752C:p.S3251T                                                                                                                                                                    |
| OBSCN   | NBL47R4 | chr1  | 228509528 | G | A | 1q42.13 | heterozygous | - | nonsynonymous SNV | OBSCN:uc001hsn.3:exon55:c.G14986A:p.E4996K,OBSCN:uc009xez.1:exon55:c.G14986A:p.E4996K                                                                                                                                                                                                          |
| OBSCN   | NBL59R7 | chr1  | 228559841 | C | T | 1q42.13 | heterozygous | - | nonsynonymous SNV | OBSCN:uc001hsr.1:exon34:c.C5249T:p.S1750F,OBSCN:uc009xez.1:exon94:c.C21362T:p.S7121F                                                                                                                                                                                                           |
| OBSCN   | NBL19R6 | chr1  | 228560239 | G | A | 1q42.13 | heterozygous | - | nonsynonymous SNV | OBSCN:uc001hsr.1:exon34:c.G5647A:p.V1883M,OBSCN:uc009xez.1:exon94:c.G21760A:p.V7254M                                                                                                                                                                                                           |
| PLEKHG1 | NBL47R4 | chr6  | 151054823 | G | T | 6q25.1  | heterozygous | - | nonsynonymous SNV | PLEKHG1:uc003qnz.2:exon2:c.G6T:p.E2D,PLEKHG1:uc011eel.1:exon2:c.G126T:p.E42D,PLEKHG1:uc011eem.1:exon2:c.G183T:p.E61D,PLEKHG1:uc003qny.1:exon3:c.G6T:p.E2D                                                                                                                                      |
| PLEKHG1 | NBL6E9  | chr6  | 151055142 | C | T | 6q25.1  | heterozygous | - | nonsynonymous SNV | PLEKHG1:uc003qnz.2:exon2:c.C325T:p.P109S,PLEKHG1:uc011eel.1:exon2:c.C445T:p.P149S,PLEKHG1:uc011eem.1:exon2:c.C502T:p.P168S,PLEKHG1:uc003qny.1:exon3:c.C325T:p.P109S                                                                                                                            |
| PLEKHG3 | NBL11E4 | chr14 | 65209810  | T | C | 14q23.3 | heterozygous | - | nonsynonymous SNV | PLEKHG3:uc001xhq.1:exon4:c.T1564C:p.F522L,PLEKHG3:uc010aqh.1:exon11:c.T1675C:p.F559L,PLEKHG3:uc001xhn.1:exon15:c.T2881C:p.F961L,PLEKHG3:uc001xho.1:exon17:c.T3049C:p.F1017L,PLEKHG3:uc001xhp.2:exon17:c.T3412C:p.F1138L                                                                        |
| PLEKHG3 | NBL49R1 | chr14 | 65198841  | G | A | 14q23.3 | heterozygous | . | stopgain SNV      | PLEKHG3:uc001xho.1:exon10:c.G1154A:p.W385X,PLEKHG3:uc001xhp.2:exon9:c.G1154A:p.W385X,PLEKHG3:uc001xhn.1:exon8:c.G986A:p.W329X                                                                                                                                                                  |
| PREX2   | NBL13E5 | chr8  | 69002846  | G | T | 8q13.2  | heterozygous | - | stopgain SNV      | PREX2:uc011lez.1:exon18:c.G1951T:p.G651X,PREX2:uc003xxu.1:exon20:c.G2146T:p.G716X,PREX2:uc003xxv.1:exon20:c.G2146T:p.G716X                                                                                                                                                                     |
| PREX2   | NBL4E1T | chr8  | 69009436  | G | C | 8q13.2  | heterozygous | - | nonsynonymous SNV | PREX2:uc011lez.1:exon20:c.G2358C:p.K786N,PREX2:uc003xxu.1:exon22:c.G2553C:p.K851N,PREX2:uc003xxv.1:exon22:c.G2553C:p.K851N                                                                                                                                                                     |

|      |                       |           |       |           |          |   |          |              |   |                     |                                                                                                                                                                                                                                                                                                             |
|------|-----------------------|-----------|-------|-----------|----------|---|----------|--------------|---|---------------------|-------------------------------------------------------------------------------------------------------------------------------------------------------------------------------------------------------------------------------------------------------------------------------------------------------------|
|      | TIAM1                 | NBL50R1   | chr21 | 32638517  | G        | A | 21q22.11 | heterozygous | - | nonsynonymous SNV   | TIAM1:uc011adk.1:exon2:c.C772T:p.R258W, TIAM1:uc011adl.1:exon2:c.C772T:p.R258W, TIAM1:uc002yov.1:exon5:c.C772T:p.R258W                                                                                                                                                                                      |
|      | TIAM2                 | NBL52R2   | chr6  | 155575630 | G        | A | 6q25.3   | heterozygous | - | nonsynonymous SNV   | TIAM2:uc003qqh.3:exon12:c.G1166A:p.C389Y, TIAM2:uc003qqg.3:exon20:c.G2327A:p.C776Y, TIAM2:uc003qqf.3:exon21:c.G2519A:p.C840Y, TIAM2:uc011efl.1:exon21:c.G2399A:p.C800Y, TIAM2:uc010kji.3:exon23:c.G3077A:p.C1026Y, TIAM2:uc003qqe.3:exon25:c.G4391A:p.C1464Y, TIAM2:uc003qqb.3:exon28:c.G4391A:p.C1464Y     |
|      | TRIO                  | NBL49R1   | chr5  | 14465735  | G        | A | 5q15.2   | heterozygous | . | nonsynonymous SNV   | TRIO:uc003jfi.1:exon4:c.G658A:p.V220M, TRIO:uc003jff.2:exon37:c.G5749A:p.V1917M, TRIO:uc003jfh.1:exon32:c.G4696A:p.V1566M                                                                                                                                                                                   |
|      | VAV2                  | NBL59R9   | chr9  | 136635539 | G        | A | 9q34.2   | heterozygous | - | nonsynonymous SNV   | VAV2:uc004cet.1:exon13:c.C925T:p.R309W, VAV2:uc004cer.3:exon25:c.C2278T:p.R760W, VAV2:uc004ces.3:exon27:c.C2308T:p.R770W                                                                                                                                                                                    |
| GAPs | ARHGAP29              | NBL18E2   | chr1  | 94640251  | T        | C | 1p22.1   | heterozygous | - | nonsynonymous SNV   | ARHGAP29:uc001dqj.4:exon23:c.A2960G:p.E987G                                                                                                                                                                                                                                                                 |
|      | ARHGAP12              | NBL14R2   | chr10 | 32197395  | C        | T | 10p11.22 | heterozygous | - | nonsynonymous SNV   | ARHGAP12:uc001ivy.1:exon1:c.G383A:p.R128H, ARHGAP12:uc009xlr.1:exon2:c.G383A:p.R128H, ARHGAP12:uc001ivz.1:exon3:c.G389A:p.R130H, ARHGAP12:uc001iwb.1:exon3:c.G383A:p.R128H, ARHGAP12:uc001iwc.1:exon3:c.G383A:p.R128H, ARHGAP12:uc009xlq.1:exon3:c.G383A:p.R128H, ARHGAP12:uc009xls.2:exon3:c.G383A:p.R128H |
|      | ARHGAP20              | NBL19R6   | chr11 | 110451877 | G        | T | 11q23.1  | heterozygous | - | nonsynonymous SNV   | ARHGAP20:uc001plb.2:exon5:c.C422A:p.A141E, ARHGAP20:uc001pky.1:exon15:c.C1724A:p.A575E, ARHGAP20:uc009yyb.1:exon15:c.C1685A:p.A562E, ARHGAP20:uc001pkz.1:exon16:c.C1793A:p.A598E, ARHGAP20:uc001pla.1:exon16:c.C1685A:p.A562E                                                                               |
|      | ARHGAP20              | NBL48R&cT | chr11 | 110454388 | G        | T | 11q23.1  | heterozygous | - | nonsynonymous SNV   | ARHGAP20:uc001plb.2:exon3:c.C118A:p.Q40K, ARHGAP20:uc001pky.1:exon13:c.C1420A:p.Q474K, ARHGAP20:uc009yyb.1:exon13:c.C1381A:p.Q461K, ARHGAP20:uc001pkz.1:exon14:c.C1489A:p.Q497K, ARHGAP20:uc001pla.1:exon14:c.C1381A:p.Q461K                                                                                |
|      | ARHGAP5               | NBL50R1   | chr14 | 32560117  | A        | G | 14q12    | heterozygous | - | nonsynonymous SNV   | ARHGAP5:uc001wrl.3:exon2:c.A242G:p.N81S, ARHGAP5:uc001wrm.3:exon2:c.A242G:p.N81S, ARHGAP5:uc001wrm.3:exon2:c.A242G:p.N81S                                                                                                                                                                                   |
|      | ARHGAP5               | NBL14R2   | chr14 | 32624042  | C        | G | 14q12    | heterozygous | - | nonsynonymous SNV   | ARHGAP5:uc001wrp.3:exon5:c.C602G:p.P201R, ARHGAP5:uc001wro.3:exon6:c.C614G:p.P205R, ARHGAP5:uc001wrl.3:exon7:c.C4397G:p.P1466R, ARHGAP5:uc001wrm.3:exon7:c.C4394G:p.P1465R, ARHGAP5:uc001wrm.3:exon7:c.C4397G:p.P1466R                                                                                      |
|      | ARHGAP11A             | NBL39R1   | chr15 | 32929478  | G        | A | 15q13.3  | heterozygous | - | nonsynonymous SNV   | ARHGAP11A:uc001zgy.1:exon12:c.G2504A:p.R835H, ARHGAP11A:uc010ubw.1:exon12:c.G1937A:p.R646H, ARHGAP11A:uc010ubx.1:exon13:c.G1937A:p.R646H                                                                                                                                                                    |
|      | ARHGAP23              | NBL59R7   | chr17 | 36666694  | G        | A | 17q12    | heterozygous | - | nonsynonymous SNV   | ARHGAP23:uc021twd.1:exon24:c.G3962A:p.R1321H                                                                                                                                                                                                                                                                |
|      | ARHGAP8, PRR5-ARHGAP8 | NBL17E2   | chr22 | 45258362  | CAGGGGAG | - | 22q13.31 | heterozygous | - | frameshift deletion | ARHGAP8:uc003btk.3:exon12:c.1189_1196del:p.397_399del, ARHGAP8:uc003bfj.3:exon13:c.1282_1289del:p.428_430del, ARHGAP8:uc011aqj.2:exon13:c.1348_1355del:p.450_452del, PRR5-                                                                                                                                  |

|       |          |         |       |           |   |   |          |              |   |                         |                                                                                                                                                                                                                                                  |
|-------|----------|---------|-------|-----------|---|---|----------|--------------|---|-------------------------|--------------------------------------------------------------------------------------------------------------------------------------------------------------------------------------------------------------------------------------------------|
|       |          |         |       |           |   |   |          |              |   |                         | ARHGAP8:uc011aqi.2:exon15:c.1555_1562del;p.519_521del,ARHGAP8:uc003bfd.3:exon17:c.1819_1826del;p.607_609del                                                                                                                                      |
|       | ARHGAP24 | NBL14R2 | chr4  | 86915914  | C | G | 4q21.3   | heterozygous | - | nonsynonymous SNV       | ARHGAP24:uc003hpm.3:exon6:c.C828G;p.S276R,ARHGAP24:uc003hpl.3:exon7:c.C822G;p.S274R,ARHGAP24:uc010ikf.3:exon7:c.C852G;p.S284R,ARHGAP24:uc003hpk.3:exon9:c.C1107G;p.S369R                                                                         |
|       | ARHGAP24 | NBL18E2 | chr4  | 86916141  | G | A | 4q21.3   | heterozygous | - | nonsynonymous SNV       | ARHGAP24:uc003hpm.3:exon6:c.G1055A;p.G352D,ARHGAP24:uc003hpl.3:exon7:c.G1049A;p.G350D,ARHGAP24:uc010ikf.3:exon7:c.G1079A;p.G360D,ARHGAP24:uc003hpk.3:exon9:c.G1334A;p.G445D                                                                      |
|       | ARHGAP24 | NBL50R1 | chr4  | 86916714  | A | G | 4q21.3   | heterozygous | - | nonsynonymous SNV       | ARHGAP24:uc003hpm.3:exon6:c.A1628G;p.N543S,ARHGAP24:uc003hpl.3:exon7:c.A1622G;p.N541S,ARHGAP24:uc010ikf.3:exon7:c.A1652G;p.N551S,ARHGAP24:uc003hpk.3:exon9:c.A1907G;p.N636S                                                                      |
|       | ARHGAP39 | NBL50R1 | chr8  | 145773193 | G | A | 8q24.3   | heterozygous | - | nonsynonymous SNV       | ARHGAP39:uc011ilk.1:exon5:c.C1277T;p.S426L,ARHGAP39:uc003zds.1:exon6:c.C1277T;p.S426L,ARHGAP39:uc003zdt.1:exon6:c.C1277T;p.S426L                                                                                                                 |
|       | ARHGAP4  | NBL4E1T | chrX  | 153174571 | G | A | Xq28     | heterozygous | - | nonsynonymous SNV       | ARHGAP4:uc004fjk.2:exon21:c.C2560T;p.R854C,ARHGAP4:uc011mzf.2:exon21:c.C2491T;p.R831C,ARHGAP4:uc004fjl.2:exon22:c.C2680T;p.R894C                                                                                                                 |
|       | ARHGAP4  | NBL19R6 | chrX  | 153174912 | G | A | Xq28     | heterozygous | - | nonsynonymous SNV       | ARHGAP4:uc004fjk.2:exon20:c.C2492T;p.S831L,ARHGAP4:uc011mzf.2:exon20:c.C2423T;p.S808L,ARHGAP4:uc004fjl.2:exon21:c.C2612T;p.S871L                                                                                                                 |
|       | OPHN1    | NBL59R9 | chrX  | 67412761  | - | A | Xq12     | homozygous   | - | stopgain SNV            | OPHN1:uc004dww.4:exon15:c.1275_1276insT;p.D426_P427delinsX,OPHN1:uc011mpg.2:exon15:c.1275_1276insT;p.D426_P427delinsX                                                                                                                            |
| OTHER | ATRX     | NBL19R6 | chrX  | 76937199  | C | G | Xq21.1   | heterozygous | - | nonsynonymous SNV       | ATRX:uc004ecq.4:exon8:c.G3435C;p.E1145D,ATRX:uc010nly.1:exon8:c.G3384C;p.E1128D,ATRX:uc004ecp.4:exon9:c.G3549C;p.E1183D,ATRX:uc004ecr.2:exon9:c.G3345C;p.E1115D,ATRX:uc004eco.4:exon10:c.G2904C;p.E968D,ATRX:uc010nlx.1:exon10:c.G3462C;p.E1154D |
|       | ATRX     | NBL47R4 | chrX  | 76939744  | C | A | Xq21.1   | heterozygous | - | nonsynonymous SNV       | ATRX:uc004ecq.4:exon8:c.G890T;p.C297F,ATRX:uc004ecr.2:exon8:c.G887T;p.C296F,ATRX:uc010nly.1:exon8:c.G839T;p.C280F,ATRX:uc004ecp.4:exon9:c.G1004T;p.C335F,ATRX:uc010nlx.1:exon9:c.G1004T;p.C335F,ATRX:uc004eco.4:exon10:c.G359T;p.C120F           |
|       | ATRX     | NBL28R8 | chrX  |           |   |   | Xq21.1   |              | - | Focal deletion exon 3-8 |                                                                                                                                                                                                                                                  |
|       | CCDC42   | NBL39R1 | chr17 | 8646993   | T | C | 17p13.1  | heterozygous | - | nonsynonymous SNV       | CCDC42:uc002gln.3:exon3:c.A245G;p.K82R,CCDC42:uc002glo.3:exon3:c.A245G;p.K82R                                                                                                                                                                    |
|       | CELSR1   | NBL59R9 | chr22 | 46777929  | G | A | 22q13.31 | heterozygous | - | nonsynonymous SNV       | CELSR1:uc011arc.1:exon13:c.C1865T;p.P622L,CELSR1:uc003bhw.1:exon21:c.C6902T;p.P2301L                                                                                                                                                             |
|       | CELSR1   | NBL14R2 | chr22 | 46932653  | A | G | 22q13.31 | heterozygous | - | nonsynonymous SNV       | CELSR1:uc003bhw.1:exon1:c.T415C;p.C139R                                                                                                                                                                                                          |
|       | CELSR1   | NBL59R9 | chr22 | 46932653  | A | G | 22q13.31 | heterozygous | - | nonsynonymous SNV       | CELSR1:uc003bhw.1:exon1:c.T415C;p.C139R                                                                                                                                                                                                          |

|            |           |       |           |   |   |          |              |   |                   |                                                                                                                                                                                                             |
|------------|-----------|-------|-----------|---|---|----------|--------------|---|-------------------|-------------------------------------------------------------------------------------------------------------------------------------------------------------------------------------------------------------|
| CSMD1      | NBL47R4   | chr8  | 2808772   | A | T | 8p23.2   | heterozygous | - | nonsynonymous SNV | CSMD1:uc010lrg.3:exon28:c.T3741A:p.N1247K, CSMD1:uc011kwj.2:exon52:c.T8010A:p.N2670K, CSMD1:uc022agr.1:exon66:c.T10065A:p.N3355K                                                                            |
| DAAM2      | NBL3E2    | chr6  | 39869211  | A | G | 6p21.2   | heterozygous | - | nonsynonymous SNV | DAAM2:uc003oow.3:exon24:c.A2945G:p.K982R, DAAM2:uc003oox.3:exon24:c.A2942G:p.K981R                                                                                                                          |
| FZD8       | NBL48R&cT | chr10 | 35929895  | C | A | 10p11.21 | heterozygous | - | nonsynonymous SNV | FZD8:uc001iyz.1:exon1:c.G463T:p.D155Y                                                                                                                                                                       |
| TENM4/ODZ4 | NBL39R1   | chr11 | 78369680  | C | T | 11q14.1  | heterozygous | - | nonsynonymous SNV | ODZ4:uc001ozk.4:exon5:c.G2408A:p.R803Q, ODZ4:uc001ozl.4:exon34:c.G7733A:p.R2578Q                                                                                                                            |
| TENM4/ODZ4 | NBL3E2    | chr11 | 78412590  | C | T | 11q14.1  | heterozygous | - | nonsynonymous SNV | ODZ4:uc001ozl.4:exon28:c.G5068A:p.G1690R                                                                                                                                                                    |
| TENM4/ODZ4 | NBL48R&cT | chr11 | 78516464  | C | T | 11q14.1  | heterozygous | - | stopgain SNV      | ODZ4:uc001ozl.4:exon15:c.G2052A:p.W684X                                                                                                                                                                     |
| TENM2/ODZ2 | NBL48R&cT | chr5  | 167645875 | C | T | 5q34     | heterozygous | - | nonsynonymous SNV | ODZ2:uc010jje.3:exon12:c.C2744T:p.T9151, ODZ2:uc003lzt.4:exon14:c.C3071T:p.T1024I, ODZ2:uc003lzt.4:exon19:c.C4262T:p.T1421I, ODZ2:uc010jid.3:exon23:c.C4952T:p.T1651I                                       |
| TENM1/ODZ1 | NBL12E3   | chrX  | 123556151 | T | C | Xq25     | heterozygous | - | nonsynonymous SNV | ODZ1:uc004euj.3:exon23:c.A4421G:p.K1474R, ODZ1:uc010nqy.3:exon24:c.A4442G:p.K1481R, ODZ1:uc011muj.2:exon24:c.A4439G:p.K1480R                                                                                |
| PRICKLE1   | NBL18E2   | chr12 | 42858223  | T | G | 12q12    | heterozygous | - | nonsynonymous SNV | PRICKLE1:uc001rml.3:exon7:c.A1613C:p.D538A, PRICKLE1:uc001rml.3:exon7:c.A1613C:p.D538A, PRICKLE1:uc010skv.2:exon7:c.A1613C:p.D538A, PRICKLE1:uc010skw.2:exon7:c.A1613C:p.D538A                              |
| PRICKLE1   | NBL19R6   | chr12 | 42862582  | G | A | 12q12    | heterozygous | - | nonsynonymous SNV | PRICKLE1:uc001rml.3:exon5:c.C434T:p.A145V, PRICKLE1:uc001rml.3:exon5:c.C434T:p.A145V, PRICKLE1:uc010skv.2:exon5:c.C434T:p.A145V, PRICKLE1:uc010skw.2:exon5:c.C434T:p.A145V                                  |
| PTK7       | NBL11E4   | chr6  | 43112282  | G | T | 6p21.1   | heterozygous | - | nonsynonymous SNV | PTK7:uc003oue.1:exon12:c.G1955T:p.R652L, PTK7:uc003ouc.1:exon14:c.G2177T:p.R726L, PTK7:uc003oud.1:exon14:c.G2225T:p.R742L, PTK7:uc003oub.1:exon15:c.G2345T:p.R782L, PTK7:uc011dve.1:exon15:c.G2369T:p.R790L |
| RHO        | NBL3E2    | chr3  | 129251238 | G | C | 3q22.1   | heterozygous | - | nonsynonymous SNV | RHO:uc003emt.3:exon3:c.G675C:p.Q225H                                                                                                                                                                        |
| ROCK2      | NBL52R2   | chr2  | 11357243  | G | A | 2p25.1   | heterozygous | - | nonsynonymous SNV | ROCK2:uc002rbd.1:exon12:c.C1385T:p.A462V                                                                                                                                                                    |
| TRIOBP     | NBL3E2    | chr22 | 38119518  | A | C | 22q13.1  | heterozygous | - | nonsynonymous SNV | TRIOBP:uc003ats.1:exon5:c.A439C:p.T147P, TRIOBP:uc003atu.3:exon5:c.A439C:p.T147P, TRIOBP:uc003atr.3:exon7:c.A955C:p.T319P, TRIOBP:uc003atq.1:exon13:c.A955C:p.T319P                                         |

**Table S2.** Summary of non silent mutation count in neuroblastoma in our won sequenced material and in published cohorts (n=383).

|             | Gene     | Non silent mutations | Overall mutation frequency | Type of alteration          | Ref  |
|-------------|----------|----------------------|----------------------------|-----------------------------|------|
| <b>GEFS</b> | AKAP13   | 2                    | 0.52%                      | mis (2)                     | 2    |
|             | ALS2     | 2                    | 0.52%                      | mis (1), struct (1)         | 1, 2 |
|             | ARHGEF4  | 1                    | 0.26%                      | mis (1)                     | 2    |
|             | ARHGEF7  | 1                    | 0.26%                      | struct (1)                  | 4    |
|             | ARHGEF9  | 1                    | 0.26%                      | mis (1)                     | 2    |
|             | ARHGEF12 | 2                    | 0.52%                      | mis (1), struct (1)         | 1, 2 |
|             | ARHGEF17 | 2                    | 0.52%                      | mis (2)                     | 2    |
|             | ARHGEF37 | 1                    | 0.26%                      | mis (1)                     | 4    |
|             | ARHGEF40 | 1                    | 0.26%                      | mis (1)                     | 3    |
|             | DNMBP    | 2                    | 0.52%                      | mis (2)                     | 2    |
|             | ECT2L    | 1                    | 0.26%                      | mis (1)                     | 2    |
|             | FGD4     | 1                    | 0.26%                      | mis (1)                     | 2    |
|             | FGD6     | 2                    | 0.52%                      | mis (2)                     | 2    |
|             | KALRN    | 1                    | 0.26%                      | mis (1)                     | 2    |
|             | MCF2L    | 1                    | 0.26%                      | mis (1)                     | 2    |
|             | MCF2L2   | 1                    | 0.26%                      | fs (1)                      | 2    |
|             | NGEF     | 1                    | 0.26%                      | mis (1)                     | 2    |
|             | OBSCN    | 5                    | 1.31%                      | fs (2), mis (3)             | 2    |
|             | PLEKHG2  | 1                    | 0.26%                      | mis (1)                     | 2    |
|             | PLEKHG3  | 1                    | 0.26%                      | fs (1)                      | 2    |
|             | PREX1    | 1                    | 0.26%                      | mis (1)                     | 2    |
|             | PREX2    | 1                    | 0.26%                      | mis (1)                     | 2    |
|             | SOS1     | 1                    | 0.26%                      | fs (1)                      | 1    |
|             | SPATA13  | 2                    | 0.52%                      | mis (2)                     | 1,2  |
|             | TIAM1    | 4                    | 1.04%                      | mis (3), stop (1)           | 1, 4 |
|             | TIAM2    | 1                    | 0.26%                      | mis (1)                     | 2    |
|             | TRIO     | 6                    | 1.57%                      | struct (2), fs (1), mis (3) | 1, 2 |
|             | VAV1     | 1                    | 0.26%                      | mis (1)                     | 3    |
|             | VAV2     | 1                    | 0.26%                      | mis (1)                     | 2    |
|             | VAV3     | 2                    | 0.52%                      | struct (1), mis (1)         | 1,4  |
| <b>GAPs</b> | ARHGAP10 | 2                    | 0.52%                      | mis (2)                     | 1    |
|             | ARHGAP15 | 1                    | 0.26%                      | struct (1)                  | 2    |
|             | ARHGAP20 | 2                    | 0.52%                      | mis (2)                     | 2    |
|             | ARHGAP23 | 1                    | 0.26%                      | struct (1)                  | 1    |
|             | ARHGAP25 | 1                    | 0.26%                      | mis (1)                     | 2    |
|             | ARHGAP26 | 1                    | 0.26%                      | mis (1)                     | 1    |
|             | ARHGAP31 | 1                    | 0.26%                      | mis (1)                     | 2    |
|             | ARHGAP32 | 1                    | 0.26%                      | mis (1)                     | 2    |
|             | ARHGAP4  | 1                    | 0.26%                      | splice (1)                  | 2    |
|             | ARHGAP5  | 1                    | 0.26%                      | fs (1)                      | 2    |

|              |            |       |            |                                |         |
|--------------|------------|-------|------------|--------------------------------|---------|
|              | ARHGAP6    | 2     | 0.52%      | fs (1), mis (1)                | 2       |
|              | ARHGAP8    | 1     | 0.26%      | mis (1)                        | 2       |
|              | DLC1       | 3     | 0.78%      | struct (2), mis (1)            | 1, 2    |
|              | GMIP       | 1     | 0.26%      | fs (1)                         | 2       |
|              | HMHA1      | 1     | 0.26%      | fs (1)                         | 2       |
|              | OPHN1      | 1     | 0.26%      | splice (1)                     | 2       |
|              | SH3BP1     | 1     | 0.26%      | mis (1)                        | 2       |
|              | SRGAP1     | 1     | 0.26%      | mis (1)                        | 2       |
|              | STARD8     | 1     | 0.26%      | mis (1)                        | 1       |
|              | TAGAP      | 3     | 0.78%      | mis (3)                        | 1, 2    |
| <b>OTHER</b> | ATRX       | 35    | 9.14%      | stop (2), mis (3), struct (28) | 1, 2, 4 |
|              | CELSR1     | 1     | 0.26%      | mis (1)                        | 2       |
|              | CELSR2     | 3     | 0.78%      | mis (2), fs (1)                | 1, 2    |
|              | CELSR3     | 2     | 0.52%      | mis (1), fs (1)                | 2       |
|              | CSMD1      | 5     | 1.31%      | mis (2), struct (3)            | 1, 2, 4 |
|              | CSMD2      | 2     | 0.52%      | struct (1), mis (1)            | 1, 2    |
|              | CSMD3      | 3     | 0.78%      | struct (2), mis (1)            | 1, 2, 4 |
|              | DAAM1      | 1     | 0.26%      | mis (1)                        | 2       |
|              | DVL2       | 1     | 0.26%      | fs (1)                         | 2       |
|              | FZD10      | 1     | 0.26%      | mis (1)                        | 2       |
|              | FZD2       | 1     | 0.26%      | mis (1)                        | 2       |
|              | FZD5       | 1     | 0.26%      | mis (1)                        | 4       |
|              | FZD6       | 1     | 0.26%      | mis (1)                        | 2       |
|              | FZD7       | 1     | 0.26%      | mis (1)                        | 2       |
|              | ODZ1/TENM1 | 3     | 0.78%      | mis (3)                        | 2, 4    |
|              | ODZ2/TENM2 | 4     | 1.04%      | mis (1), struct (3)            | 1, 2, 4 |
|              | ODZ3/TENM3 | 6     | 1.57%      | struct (6)                     | 1, 2    |
|              | ODZ4/TENM4 | 4     | 1.04%      | mis (4)                        | 1,2     |
|              | PRICKLE3   | 1     | 0.26%      | mis (1)                        | 2       |
|              | PTPRD      | 6     | 1.57%      | struct (6)                     | 1, 4    |
|              | RND1       | 1     | 0.26%      | struct (1)                     | 1       |
|              | ROCK1      | 1     | 0.26%      | mis (1)                        | 2       |
|              | ROCK2      | 1     | 0.26%      | mis (1)                        | 2       |
|              | ROR2       | 1     | 0.26%      | mis (1)                        | 1       |
|              | SCRIB      | 1     | 0.26%      | mis (1)                        | 1       |
|              | TRIOBP     | 2     | 0.52%      | mis (2)                        | 2,4     |
| VANGL1       | 3          | 0.78% | mis (3)    | 2,3                            |         |
| VANGL2       | 1          | 0.26% | mis (1)    | 2                              |         |
| WNT5B        | 1          | 0.26% | struct (1) | 1                              |         |

Abbreviations; GEFs, guanine nucleotide exchange factors; GAPs, GTPase Activating proteins; fs, frameshift; mis, missense; stop, stop gain; splice, splice site; struct, structural aberration.



**Table S3.** Genomic profile of the investigated neuroblastoma patients cohorts, in tumors with at least one somatic mutation in with Rho/Rac/ATRX associated gene, Rho/Rac associated gene and in the whole cohorts.

| Set                  | (n) | Tumors with non silent mutations in genes in the Rho/Rac/ATRX pathway | Genomic profile of tumors with mutations in genes in the Rho/Rac/ATRX pathway |          |                    | Tumors with non silent mutations in genes in the Rho/Rac* pathway | Genomic profile of tumors with mutations in genes in the Rho/Rac* pathway |          |                    | Genomic profile of all tumors in the cohorts |           |                    |
|----------------------|-----|-----------------------------------------------------------------------|-------------------------------------------------------------------------------|----------|--------------------|-------------------------------------------------------------------|---------------------------------------------------------------------------|----------|--------------------|----------------------------------------------|-----------|--------------------|
|                      |     |                                                                       | 11q-del                                                                       | MYCN-amp | Other <sup>#</sup> |                                                                   | 11q-del                                                                   | MYCN-amp | Other <sup>#</sup> | 11q-del                                      | MYCN-amp  | Other <sup>#</sup> |
| Pugh et al. 2013     | 240 | 71 (30%)                                                              | 36 (51%)                                                                      | 17 (24%) | 18 (25%)           | 55 (23%)                                                          | 21 (38%)                                                                  | 17 (31%) | 17 (31%)           | 103 (43%)                                    | 77 (32%)  | 60 (25%)           |
| Molenaar et al. 2012 | 87  | 29 (33%)                                                              | NA                                                                            | 9 (31%)  | NA                 | 27 (31%)                                                          | NA                                                                        | 9 (33%)  | NA                 | NA                                           | 23 (26%)  | NA                 |
| Sausen et al. 2013   | 16  | 4 (25%)                                                               | 1 (25%)                                                                       | 3 (75%)  | 0                  | 4 (25%)                                                           | 1 (25%)                                                                   | 3 (75%)  | 0                  | NA                                           | 8 (50%)   | NA                 |
| Our material         | 40  | 13 (32.5%)                                                            | 8 (62%)                                                                       | 2 (15%)  | 3 (23%)            | 11 (27.5%)                                                        | 6 (55%)                                                                   | 2 (18%)  | 3 (27%)            | 16 (40%)                                     | 13 (32%)  | 11 (28%)           |
| All                  | 383 | 117 (30.5%)                                                           | 45 (51%)                                                                      | 31 (26%) | 21 (24%)           | 97 (25%)                                                          | 27 (45%)                                                                  | 30 (31%) | 20 (33%)           | 119 (42%)                                    | 121 (32%) | 71 (25%)           |

\*Alterations in Rho/Rac associated genes excluding ATRX;

# This group includes tumors with genomic signatures corresponding to 17q gain, other structural or numerical only profiles

**Table S4.** All Rho/Rac associated genes investigated in the analyses.

|              |           |            |            |         |         |
|--------------|-----------|------------|------------|---------|---------|
| <b>GEFS</b>  | ABR       | ARHGEF15   | ECT2       | MCF2L2  | TIAM2   |
|              | AKAP13    | ARHGEF16   | ECT2L      | NET1    | TRIO    |
|              | ALS2      | ARHGEF17   | FARP1      | NGEF    | VAV1    |
|              | ARHGEF1   | ARHGEF18   | FARP2      | OBSCN   | VAV2    |
|              | ARHGEF2   | ARHGEF19   | FGD1       | PLEKHG1 | VAV3    |
|              | ARHGEF3   | ARHGEF25   | FGD2       | PLEKHG2 |         |
|              | ARHGEF4   | ARHGEF26   | FGD3       | PLEKHG3 |         |
|              | ARHGEF5   | ARHGEF33   | FGD4       | PREX1   |         |
|              | ARHGEF6   | ARHGEF34P  | FGD5       | PREX2   |         |
|              | ARHGEF7   | ARHGEF35   | FGD6       | RASGRF1 |         |
|              | ARHGEF9   | ARHGEF37   | ITSN1      | RASGRF2 |         |
|              | ARHGEF10  | ARHGEF38   | ITSN2      | SOS1    |         |
|              | ARHGEF10L | ARHGEF40   | KALRN      | SOS2    |         |
| ARHGEF11     | BCR       | MCF2       | SPATA13    |         |         |
| ARHGEF12     | DNMBP     | MCF2L      | TIAM1      |         |         |
| <b>GAPs</b>  | ARHGAP1   | ARHGAP20   | ARHGAP30   | ARHGAP5 | HMHA1   |
|              | ARHGAP10  | ARHGAP21   | ARHGAP31   | ARHGAP6 | OPHN1   |
|              | ARHGAP11A | ARHGAP22   | ARHGAP32   | ARHGAP8 | SH3BP1  |
|              | ARHGAP11B | ARHGAP23   | ARHGAP35   | ARHGAP9 | SRGAP1  |
|              | ARHGAP12  | ARHGAP24   | ARHGAP36   | CHN1    | SRGAP2  |
|              | ARHGAP15  | ARHGAP25   | ARHGAP39   | CHN2    | SRGAP3  |
|              | ARHGAP16P | ARHGAP26   | ARHGAP4    | DLC1    | STARD13 |
|              | ARHGAP17  | ARHGAP27   | ARHGAP40   | FAM13A  | STARD8  |
|              | ARHGAP18  | ARHGAP28   | ARHGAP42   | FAM13B  | TAGAP   |
|              | ARHGAP19  | ARHGAP29   | ARHGAP44   | GMIP    |         |
| <b>OTHER</b> | ATRX      | FZD1       | TENM4/ODZ4 | RHOBTB3 | ROCK1   |
|              | CDC42     | FZD10      | PRICKLE1   | RHOC    | ROCK2   |
|              | CELSR1    | FZD2       | PRICKLE2   | RHOD    | ROR1    |
|              | CELSR2    | FZD3       | PRICKLE3   | RHOF    | ROR2    |
|              | CELSR3    | FZD4       | PTK7       | RHOG    | SCRIB   |
|              | CSMD1     | FZD5       | PTPRD      | RHOH    | TRIOBP  |
|              | CSMD2     | FZD6       | RAC1       | RHOJ    | VANGL1  |
|              | CSMD3     | FZD7       | RAC2       | RHOQ    | VANGL2  |
|              | DAAM1     | FZD8       | RAC3       | RHOU    | WNT11   |
|              | DAAM2     | FZD9       | RHOA       | RHOV    | WNT5A   |
|              | DVL1      | TENM1/ODZ1 | RHOB       | RND1    | WNT5B   |
|              | DVL2      | TENM2/ODZ2 | RHOBTB1    | RND2    |         |
|              | DVL3      | TENM3/ODZ3 | RHOBTB2    | RND3    |         |

Abbreviations; GEFs, guanine nucleotide exchange factors; GAPs, GTPase Activating proteins

**A**

**ROCK1**

**ROCK2**

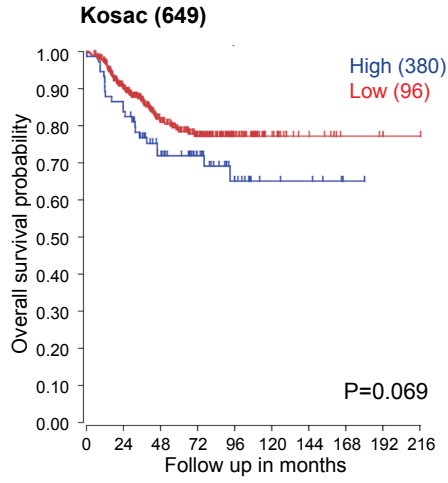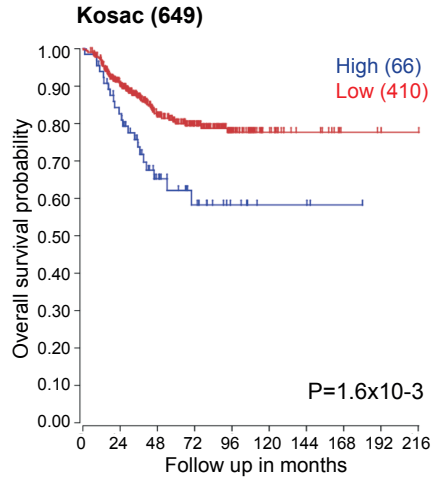

**B**

**Versteeg (88)**

**Versteeg (88)**

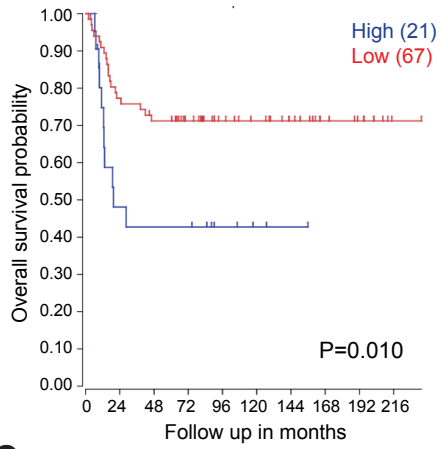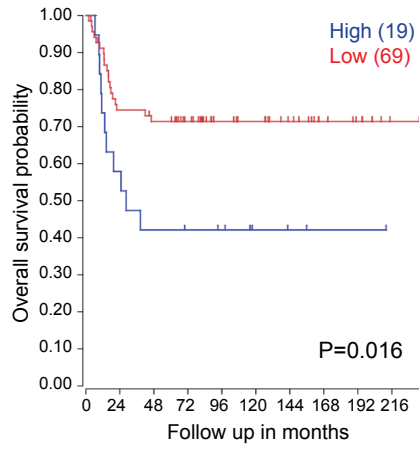

**C**

**Asgharzadeh (249)**

**Asgharzadeh (249)**

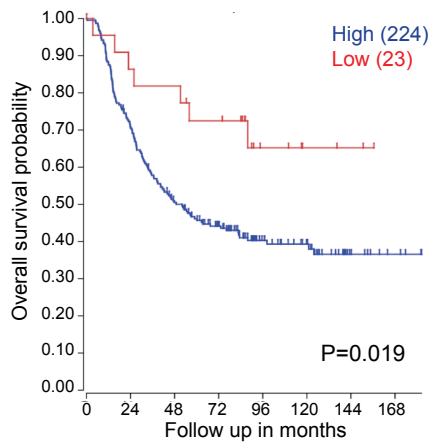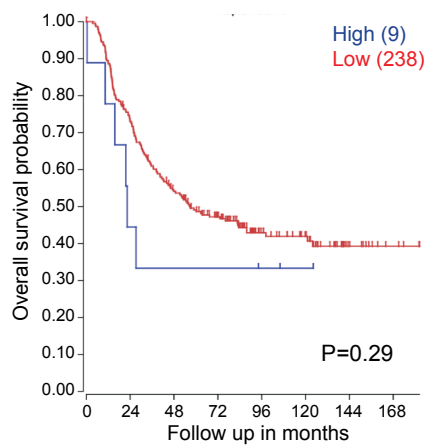

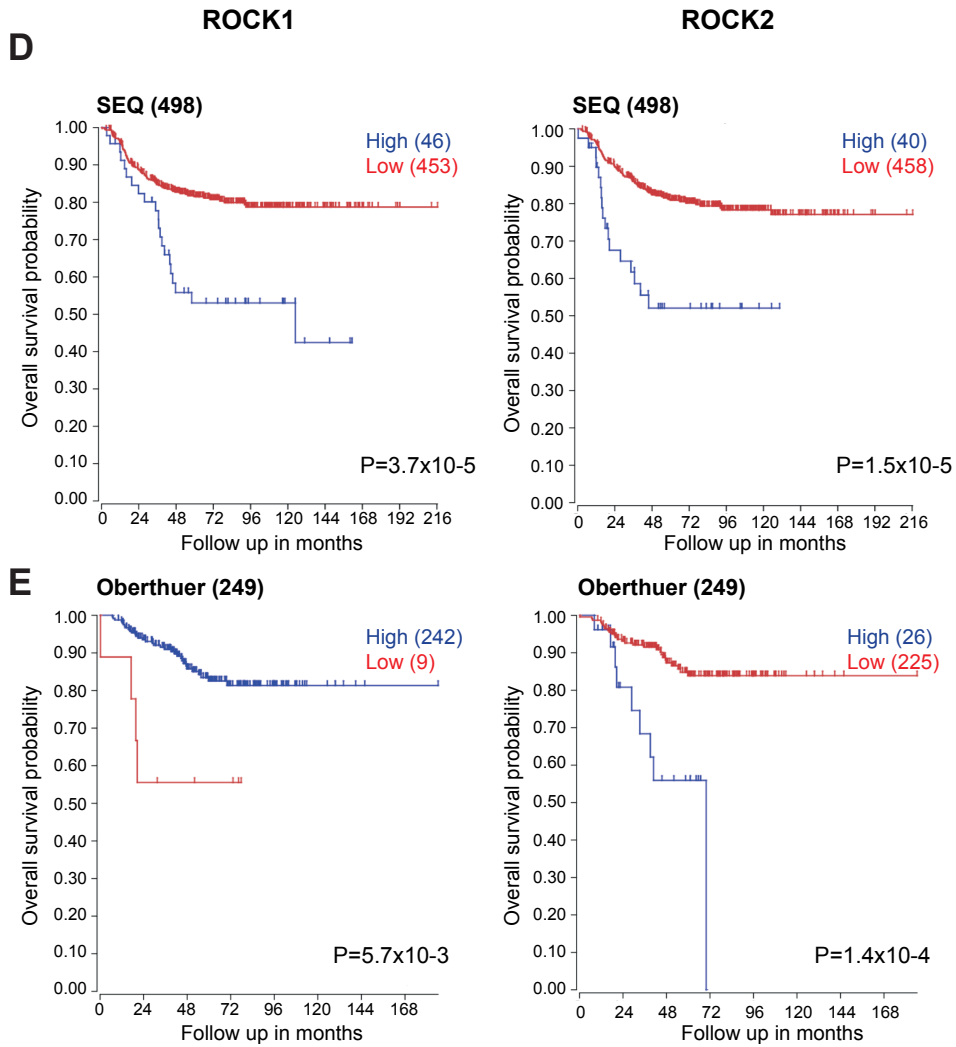

**Fig. S1. Kaplan-Meier survival estimates of high/low *ROCK1* and *ROCK2* mRNA expression from five different neuroblastoma expression cohorts. *P* values from one-way ANOVA with Bonferroni post test. Data from R2: microarray analysis and visualization platform (<http://r2.amc.nl>)**

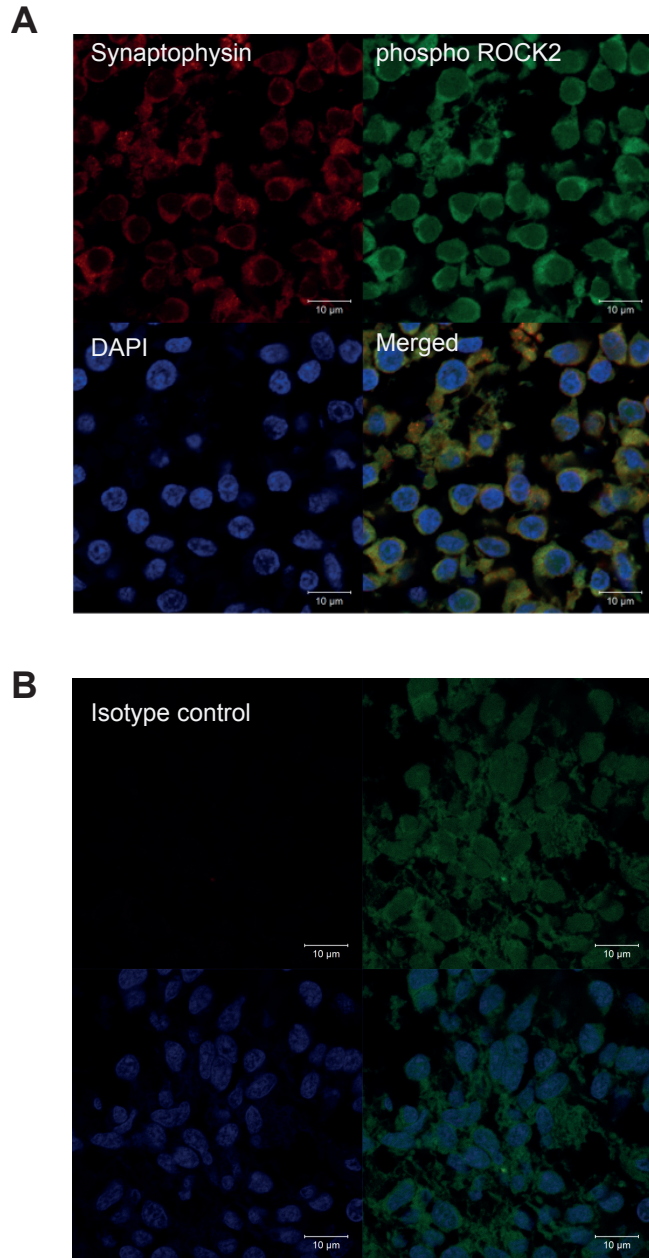

**Fig. S2. Neuroblastoma tissue samples express activated ROCK2 in tumor cells.** (A) Immunofluorescence staining of neuroblastoma tissue showing synaptophysin (red), phosphorylated ROCK2 (green), DAPI (blue) and overlay (yellow). (B) Isotype control.

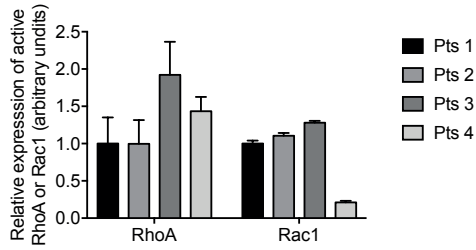

**Fig. S3. Relative expression of active RhoA and Rac1 protein in human neuroblastoma samples.** Shown as ratio of positive control and normalized to patient sample 1. Investigated by ELISA, in tumor material from the same four neuroblastoma samples as shown in Fig. 1. Mean of at least five determinations with S.E.M. are displayed.

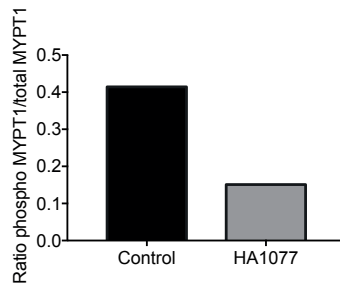

**Fig. S4. The expression of phosphorylated MYPT1 was decreased in SK-N-BE(2) cells after treatment with HA1077.** Here shown as ratio between phosphorylated MYPT1 and total MYPT1. Protein expression was determined with western blot (shown in Fig. 2D) and assessed with densitometry.

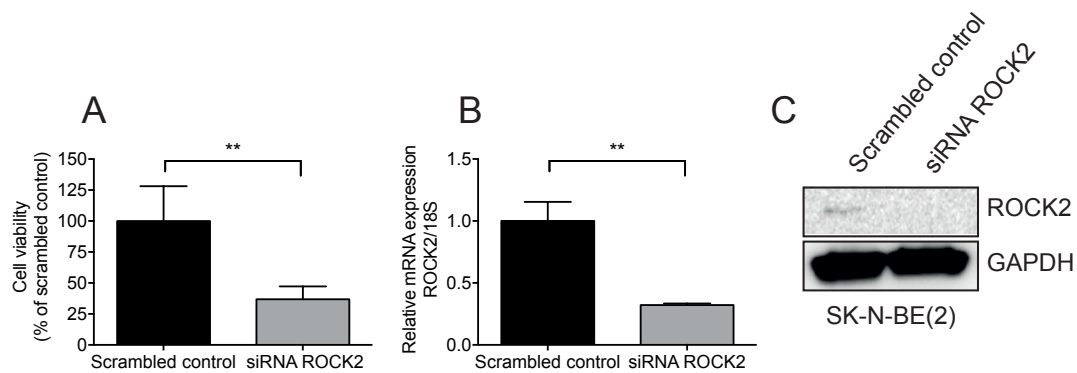

**Fig. S5. Downregulating of ROCK2 in neuroblastoma cells using a second siRNA sequence.** (A) siRNA mediated inhibition of ROCK2 suppressed the growth of SK-N-BE(2) neuroblastoma cells. Mean with S.D. is shown. (B) Measurement of ROCK2 mRNA and protein in neuroblastoma cells transfected with ROCK2 siRNA.

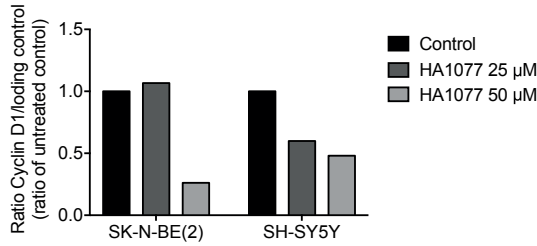

**Fig. S6. The protein expression of cyclin D1 in neuroblastoma cells treated with HA1077** Here shown as ratio between cyclin D1 and loading control. Protein expression was determined with western blot (shown in Fig. 3A), SK-N-BE(2) at 96 hours and SH-SY5Y at 72 hours, and assessed with densitometry.

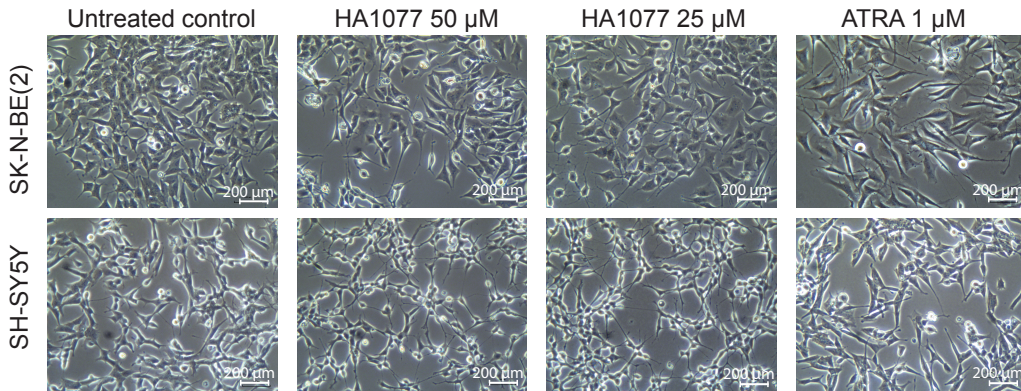

**Fig. S7. Morphological differentiation of SK-N-BE(2) in response to HA1077 (50  $\mu$ M, 72 hours) and retinoic acid (ATRA, 1  $\mu$ M, 72 hours).** Images were acquired using a phase contrast microscope (Nikon eclipse TS100, 20X objective). The experiment was repeated three times.

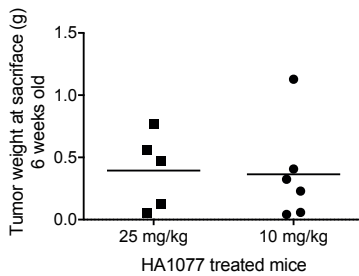

**Fig. S8. Mice homozygous for the *MYCN* transgene (TH-*MYCN*<sup>+/+</sup>) treated with two different doses of HA1077, 25 mg/kg (n=5) and 10 mg/kg (n=6) for ten days, respectively.** The two HA1077 doses investigated did not differ in effect on tumor growth inhibition (mean 0.39 g vs. 0.36 g, t-test  $P=0.90$ ). Individual tumor weights are shown, with a line representing the mean.

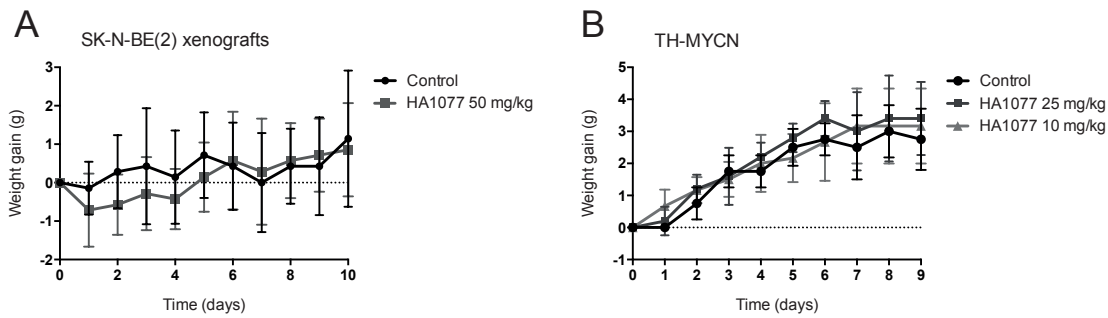

**Fig. S9. Effect of HA1077 treatment on mouse body weight.** No differences in weight gain for mice treated with HA1077 compared to untreated control mice were detected during the in vivo experiments. (A) Weight gain in nude mice engrafted with human SK-N-BE(2) cells treated with 50 mg/kg HA1077 (n=7) or vehicle (n=7) (day 10, end of treatment, t-test  $P=0.73$ , two-way ANOVA  $P=0.59$  in regard to treatment). (B) Weight gain in TH-MYCN<sup>+/+</sup> mice treated with either HA1077 (25 or 10 mg/kg) or no treatment (day 9, end of treatment, one-way ANOVA  $P=0.75$ ; two-way ANOVA  $P=0.75$  for treatments). Mean with S.D. are displayed (A, B).

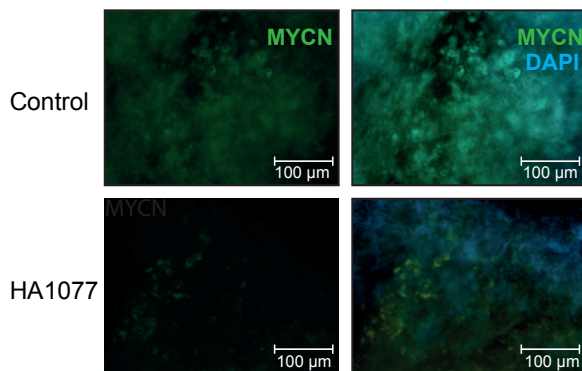

**Fig. S10. MYCN expression in organotypic cultures of mice neuroblastomas.** Tumors were sliced, put on insert membranes and grown *ex vivo* as organotypic cultures for 7 days before immunostaining for MYCN. TH-MYCN<sup>+/+</sup> tumors exposed to HA1077 (50  $\mu$ M, 7 days) and non-treated tumors showed a marked inhibition of MYCN protein (images to the left: green staining for MYCN; to the right: with green MYCN staining and blue DAPI staining for nucleus, 20X).



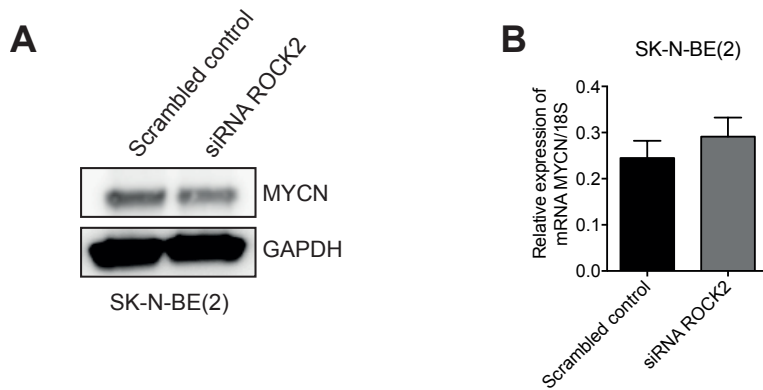

**Fig. S11. *ROCK2* regulate MYCN protein levels in neuroblastoma cells.** (A, B) SK-N-BE(2) neuroblastoma cells were transiently transfected with an alternative siRNA sequence targeting ROCK2. siRNA-mediated inhibition of *ROCK2* expression resulted in decreased MYCN protein levels (determined with western blotting) (A) but without affecting the mRNA levels of MYCN (studied with quantitative PCR) (B). Mean with S.D. of three determinations is presented.

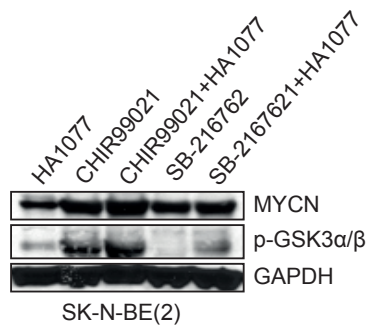

**Fig. S12. GSK3β activity regulates MYCN protein levels in neuroblastoma.** Western blot analysis demonstrating that the small-molecule GSK3β inhibitors, CHIR99021 and SB-216763 for 48 hours increase GSK3β phosphorylation (ser9) and elevated MYCN protein levels in combination with HA1077, SK-N-BE(2) neuroblastoma cells.

**A****Maris (n=101)**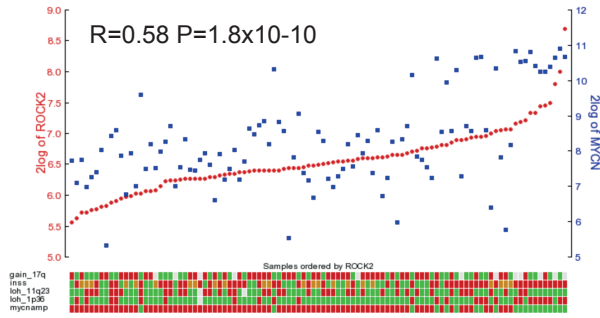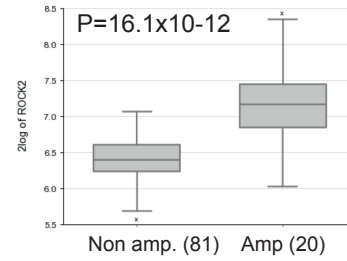**B****Versteeg n=88**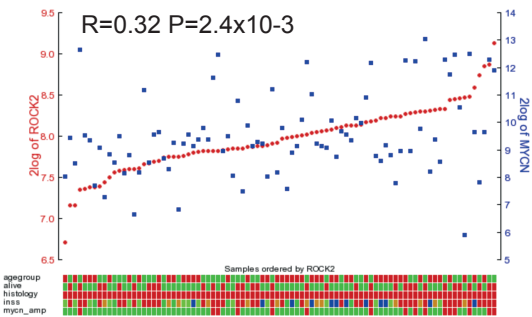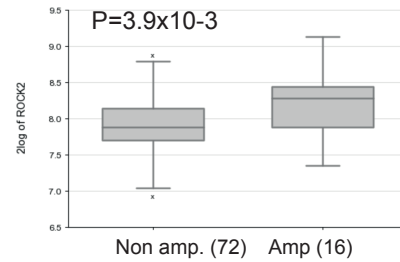**C****Kocak N=649**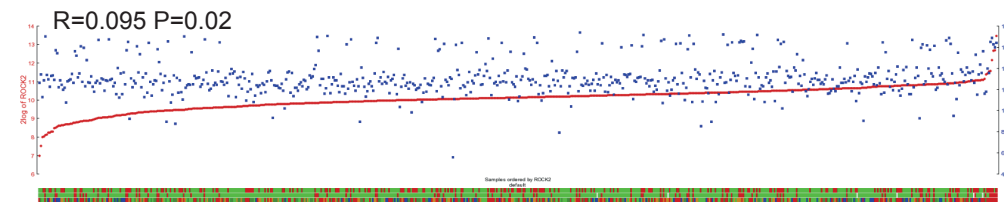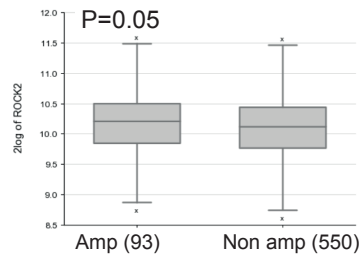

**Fig. S13.** *ROCK2* and *MYCN* expression is correlated in neuroblastoma tissue samples. A significant correlation between *ROCK2* and *MYCN* expression was observed throughout different public available and validated microarray datasets of neuroblastoma samples; (A) Maris dataset R=0.58,  $P=1.8 \times 10^{-10}$ , n=101; (B) Versteeg dataset R=0.32,  $P=0.0024$ , n=88 and (C) Kocak dataset R=0.095,  $P=0.02$ , n=649. Also, *ROCK2* expression was significantly higher in *MYCN*

amplified samples; (A) Maris dataset  $P=16.1 \times 10^{-12}$ ,  $n=101$ ; (B) Versteeg dataset  $P=0.0039$ ,  $n=88$  and (C) Kocak dataset  $P=0.01$ ,  $n=471$ . Analyses were done in R2: microarray analysis and visualization platform (<http://r2.amc.nl>).
